# Supplementary material for: T cells expressing NKG2D chimeric antigen receptors efficiently eliminate glioblastoma and cancer stem cells
Source: J Immunother Cancer. 2019 Jul 9;7:171. doi: 10.1186/s40425-019-0642-9 (PMC6617951; doi:10.1186/s40425-019-0642-9)
Supplement: Supplementary file 2 — Table S2. Primers used in this study for real-time PCR. (XLSX 14 kb) [file 40425_2019_642_MOESM2_ESM.xlsx]

## Sheet: Sheet1
Table S2 Primers used in this study for real-time PCR
18S	F	GTAACCCGTTGAACCCCATT
	R	CCATCCAATCGGTAGTAGCG
CD133	F	AGTCGGAAACTGGCAGATAGC
	R	GGTAGTGTTGTACTGGGCCAAT
NESTIN	F	CTGCTACCCTTGAGACACCTG
	R	GGGCTCTGATCTCTGCATCTAC
SOX2	F	GCCGAGTGGAAACTTTTGTCG
	R	GGCAGCGTGTACTTATCCTTCT
GAPDH	F	GTCTCCTCTGACTTCAACAGCG
	R	ACCACCCTGTTGCTGTAGCCAA
